# Supplementary material
Source: publisher site journal article supplement (https://oneecosystem.pensoft.net/article/download/suppl/6413368/)
Supplement: Supplementary file 1

## Sheet: Montane
Canopy layer
Species	Family	RDen	RFreq	RDom	IV
Dacrydium beccarii Parl.	Podocarpaceae	26.14	22.22	72.56	120.91
Cyathea negrosiana Christ.	Cyatheaceae	36.36	22.22	6.41	64.99
Tasmannia piperita (Hook.f.) Miers	Winteraceae	14.77	19.44	14.4	48.61
Elaeocarpus argenteus Merr.	Elaeocarpaceae	9.09	11.11	3.15	23.35
Melastoma crinitum Naudin	Melastomataceae	4.55	8.33	0.8	13.67
Omolanthus populneus (Geisel.) Pax.	Euphorbiaceae	4.55	5.56	1.63	11.73
Vaccinium microphyllum Reinw. ex Blume	Ericaceae	2.27	5.56	0.72	8.54
Syzgium sp.	Myrtaceae	1.14	2.78	0.21	4.12
Cyathea contaminans (Wall. ex Hook.) Copel.	Cyatheaceae	1.14	2.78	0.14	4.06
Intermediate layer
Cyathea negrosiana Christ.	Cyatheaceae	13.74	12.5	28.98	55.23
Freycinetia lagenicarpa Warb.	Pandanaceae	12.21	12.5	14.52	39.24
Astronia cumingiana S.Vidal	Melastomataceae	12.21	9.38	8.24	29.83
Dimorphanthera apoana (Merr.) Schltr	Ericaceae	12.21	7.81	4.28	24.31
Eurya buxifolia Merr.	Pentaphylacaceae	4.58	6.25	5.61	16.44
Pinanga insignis Becc.	Arecaceae	4.58	3.13	8.65	16.36
Tasmannia piperita (Hook.f.) Miers	Winteraceae	5.34	4.69	1.8	11.84
Dacrydium beccarii Parl.	Podocarpaceae	3.05	3.13	3.85	10.03
Elaeocarpus argenteus Merr.	Elaeocarpaceae	3.05	3.13	3.56	9.73
Melastoma sp.	Melastomataceae	3.82	4.69	1.13	9.64
Ground cover
Blechnum vestitum (Blume) Kuhn	Blechnaceae	15.16	13.41	21.7	50.27
Freycinetia lagenicarpa Warb.	Pandanaceae	16.14	14.53	15.98	46.64
Cyathea negrosiana Christ.	Cyatheaceae	11.98	12.29	16.79	41.06
Tasmannia piperita (Hook.f.) Miers	Winteraceae	6.36	5.03	3.92	15.3
Melastoma malabathricum L.	Melastomataceae	4.16	6.15	2.92	13.22
Scleria scrobiculata Nees & Meyen	Cyperaceae	6.6	2.23	2.3	11.14
Vaccinium sp.	Ericaceae	3.67	2.79	2.74	9.2
Pinanga insignis Becc.	Arecaceae	1.96	4.47	2.24	8.66
Fimbristylis dichotoma (L.) Vah.	Cyperaceae	3.18	3.35	1.93	8.46
Cyathea contaminans (Wall. ex Hook.) Copel.	Cyatheaceae	1.96	2.23	3.92	8.11
